# Supplementary material
Source: PubMed Central journal article supplement (PMC3035523)
Supplement: supp_D003814_jlr.D003814-3.pdf [file supp_D003814_jlr.D003814-3.pdf]

Supplemental Data Table 1

Accuracy, limit of detection (LOD), limit of quantification (LOQ) from spiked serum material (level 1: 5  $\mu\text{mol/L}$ , level 2: 20 $\mu\text{mol/L}$  bile acid)

| Name | Level | Intra-Day      | Inter-Day | Recovery | LOQ      | LOD  |
|------|-------|----------------|-----------|----------|----------|------|
|      |       | [CV in %] n=10 |           | [%]      | [nmol/L] |      |
| TDC  | 1     | 4.5            | 6.4       | 89.7     | 12.0     | 4.0  |
|      | 2     | 4.2            | 8.0       | 98.6     |          |      |
| DC   | 1     | 4.1            | 7.6       | 98.9     | 64.0     | 21.3 |
|      | 2     | 4.4            | 7.7       | 96.7     |          |      |
| TC   | 1     | 4.6            | 7.5       | 94.2     | 23.0     | 7.7  |
|      | 2     | 4.0            | 9.6       | 95.7     |          |      |
| GCDC | 1     | 3.5            | 7.0       | 104.7    | 31.0     | 10.3 |
|      | 2     | 3.1            | 6.6       | 101.4    |          |      |
| CDC  | 1     | 2.3            | 7.0       | 95.2     | 53.0     | 15.3 |
|      | 2     | 4.4            | 6.5       | 93.7     |          |      |
| GDC  | 1     | 4.2            | 6.5       | 89.6     | 83.0     | 27.7 |
|      | 2     | 3.9            | 8.6       | 97.8     |          |      |
| TLC  | 1     | 4.5            | 8.7       | 94.6     | 11.0     | 3.7  |
|      | 2     | 4.6            | 9.8       | 101.4    |          |      |
| GC   | 1     | 4.7            | 5.0       | 97.1     | 22.0     | 5.1  |
|      | 2     | 2.8            | 5.2       | 99.7     |          |      |
| LC   | 1     | 5.8            | 8.8       | 73.6     | 27.0     | 5.3  |
|      | 2     | 4.7            | 9.9       | 81.2     |          |      |
| UDC  | 1     | 3.3            | 7.9       | 94.4     | 39.0     | 15.2 |
|      | 2     | 4.6            | 9.8       | 100.4    |          |      |

|      |   |     |     |       |      |      |
|------|---|-----|-----|-------|------|------|
| TUDC | 1 | 5.6 | 8.4 | 96    | 14.0 | 3.8  |
|      | 2 | 3.8 | 9.8 | 98.3  |      |      |
| TCDC | 1 | 5.3 | 8.6 | 87.7  | 21.0 | 5.0  |
|      | 2 | 3.6 | 9.8 | 97.7  |      |      |
| GUDC | 1 | 7.2 | 8.7 | 94.2  | 18.0 | 3.5  |
|      | 2 | 7.5 | 9.0 | 95.7  |      |      |
| GLC  | 1 | 4.6 | 6.8 | 99.3  | 38.0 | 17.1 |
|      | 2 | 4.2 | 7.8 | 99.8  |      |      |
| CA   | 1 | 4.2 | 6.2 | 95.7  | 61.0 | 14.9 |
|      | 2 | 5.6 | 6.6 | 97.7  |      |      |
| DHCA | 1 | 7.6 | 7.9 | 95.6  | 17.0 | 5.1  |
|      | 2 | 5.1 | 7.6 | 93.8  |      |      |
| THCA | 1 | 7.3 | 8.7 | 102.2 | 19.0 | 8.5  |
|      | 2 | 4.2 | 8.1 | 99.4  |      |      |
