# Supplementary material
Source: PubMed Central journal article supplement (PMC3035523)
Supplement: supp_D003814_jlr.D003814-4.pdf [file supp_D003814_jlr.D003814-4.pdf]

Supplemental Table 2

Bile acid concentrations in dried blood spots of patients with confirmed classical galactosemia requested in selective screening

| <b>Patient</b>   | <b>age</b><br>[days] | <b>TCDC</b><br>[ $\mu\text{mol/L}$ ] | <b>GCDC</b><br>[ $\mu\text{mol/L}$ ] | <b>TC</b><br>[ $\mu\text{mol/L}$ ] | <b>GC</b><br>[ $\mu\text{mol/L}$ ] | <b>total galactose</b><br>[mg/dl] |
|------------------|----------------------|--------------------------------------|--------------------------------------|------------------------------------|------------------------------------|-----------------------------------|
| <i>Reference</i> |                      | 2.0                                  | 1.4                                  | 1.5                                | 1.4                                | < 20                              |
| 1                | 149                  | 26.9                                 | 44.5                                 | 4.1                                | 3.0                                | 132                               |
| 2                | 43                   | 36.1                                 | 12.0                                 | 9.8                                | 2.7                                | 107                               |
| 3                | 21                   | 21.6                                 | 17.4                                 | 12.5                               | 11.3                               | 160                               |
| 4                | 1                    | 27.5                                 | 3.7                                  | 0.5                                | 4.6                                | 60                                |
| 5                | 42                   | 26.6                                 | 15.8                                 | 4.5                                | 1.4                                | 52                                |
| 6                | 10                   | 39.6                                 | 56.0                                 | 0.3                                | 0.3                                | 138                               |
| 7                | 70                   | 9.7                                  | 18.5                                 | 7.7                                | 11.1                               | 130                               |
