# Supplementary material
Source: PubMed Central journal article supplement (PMC3035523)
Supplement: supp_D003814_jlr.D003814-6.pdf [file supp_D003814_jlr.D003814-6.pdf]

Supplemental Table 4

Bile acid patterns of pediatric patients treated with ursodeoxycholic acid

| <b>Age</b> | <b>UDC</b>            | <b>TUDC</b>           | <b>GUDC</b>           | <b>TCDC</b>           | <b>GCDC</b>           | <b>TC</b>             | <b>GC</b>             |
|------------|-----------------------|-----------------------|-----------------------|-----------------------|-----------------------|-----------------------|-----------------------|
| [day]      | [ $\mu\text{mol/L}$ ] |
| 217        | 0.5                   | 21.5                  | 39.6                  | 32.9                  | 40.6                  | 8.2                   | 5.9                   |
| 159        | 14.3                  | 55.3                  | 118.2                 | 38.3                  | 65.6                  | 3.9                   | 4.7                   |
| 107        | 8.4                   | 2.2                   | 10.3                  | 6.2                   | 6.6                   | 10.6                  | 10.8                  |
| 42         | 18.2                  | 0.8                   | 6.7                   | 2.6                   | 6.2                   | 1.1                   | 5.3                   |
| 117        | 0.3                   | 12                    | 46                    | 19.6                  | 36.0                  | 22.6                  | 35.9                  |
| 52         | 6.37                  | 11.35                 | 51.88                 | 18.8                  | 24.8                  | 5.5                   | 5.6                   |
| 36         | 8                     | 9.7                   | 24.4                  | 9.8                   | 13.0                  | 12.5                  | 12.7                  |
