# Supplementary material
Source: PubMed Central journal article supplement (PMC3035523)

Supplemental Data Figure 1:

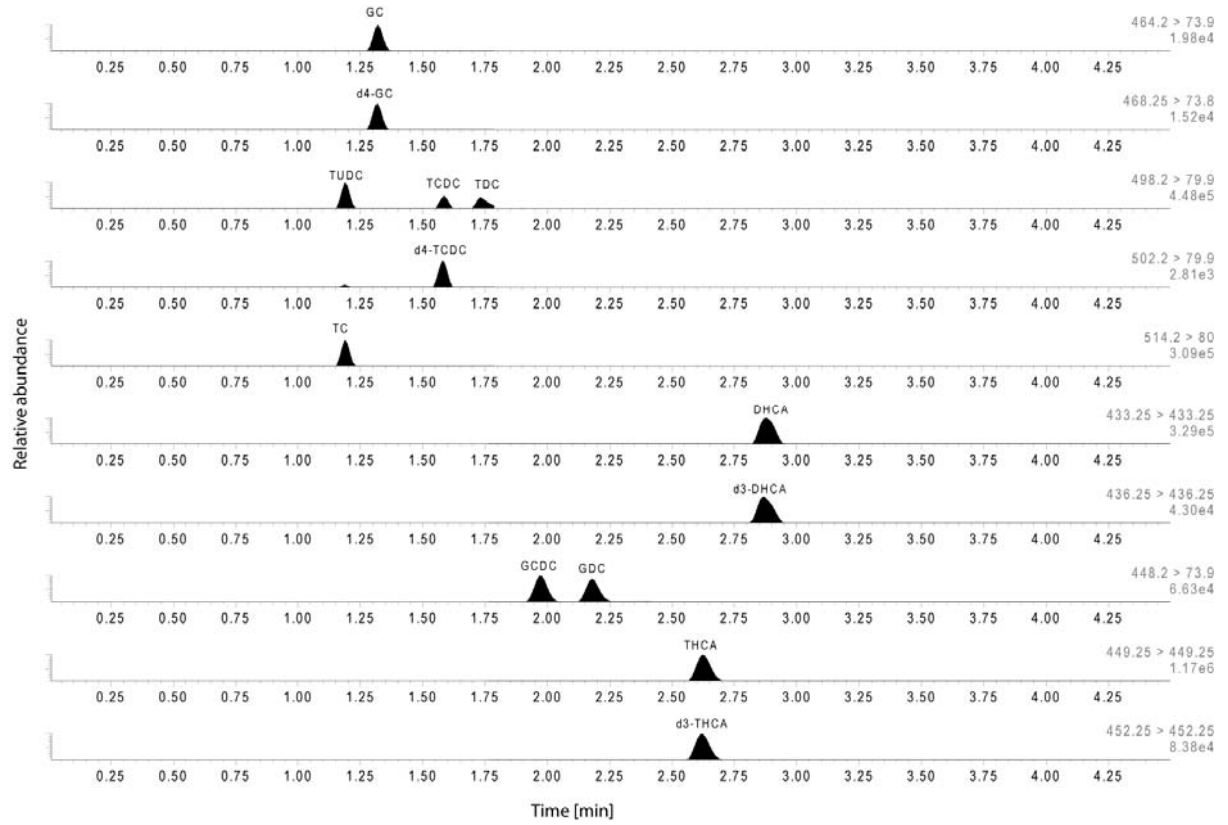

Supplement: supp_D003814_jlr.D003814-1.pdf [file supp_D003814_jlr.D003814-1.pdf]

Supplemental Data Figure 2:

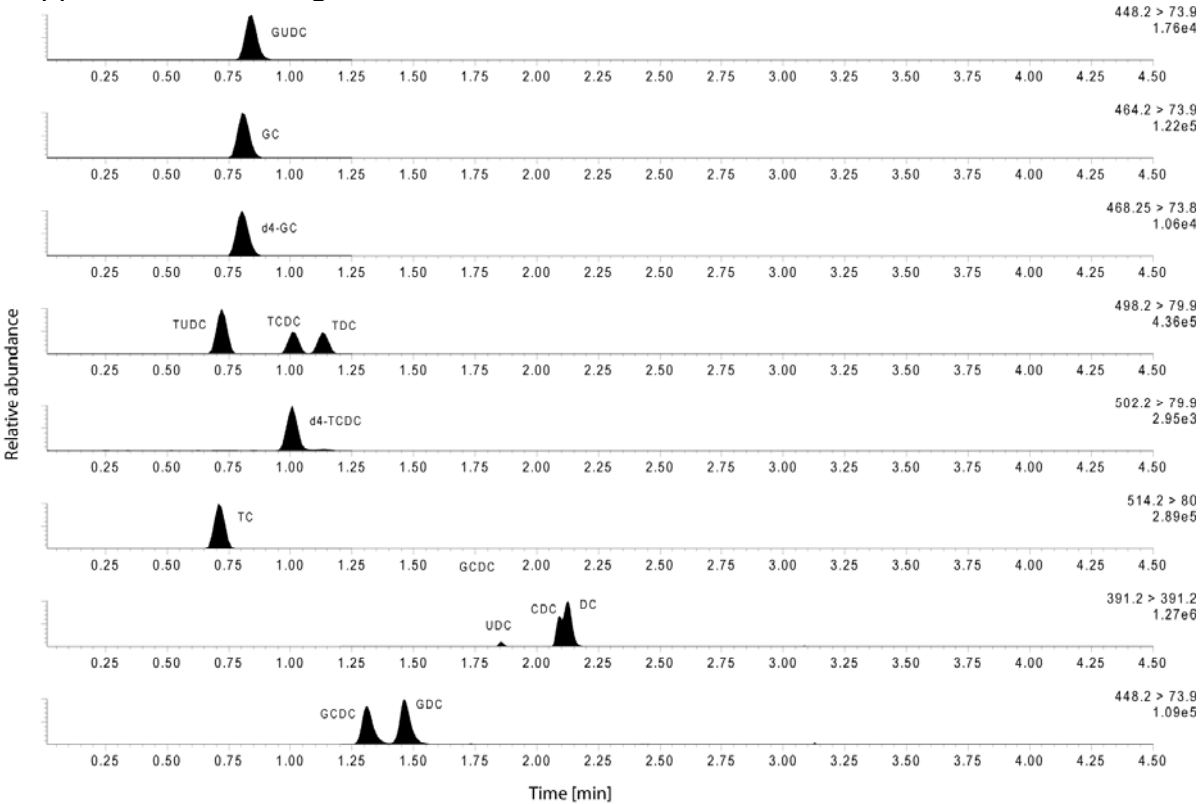

Supplement: supp_D003814_jlr.D003814-2.pdf [file supp_D003814_jlr.D003814-2.pdf]
